# Supplementary material
Source: publisher site journal article supplement (https://www.dovepress.com/article/288379)
Supplement: Supplementary file 1 [file get_supplementary_file.php]

**Supplementary materials**

**Magnetic fluid hyperthermia as treatment option for pancreatic cancer cells and pancreatic cancer organoids****Supplementary Figures**

**Supplementary Figure S1**

Volume-weighted size distribution of ML dispersed in TES buffer solution obtained by DLS measurements using a Zetasizer Nano S (Malvern Instruments Ltd., Worcestershire, United Kingdom) at a wavelength of λ = 633 nm (detection angle of 173°) determined a mean hydrodynamic diameter of 100 ± 49 nm. For hydrodynamic diameter analysis fitting with the log-normal distribution probability density function (PDF): was employed. Here, d denotes the hydrodynamic diameter. The mean hydrodynamic diameter was calculated as with the variance using the fitting parameters µ and σ.


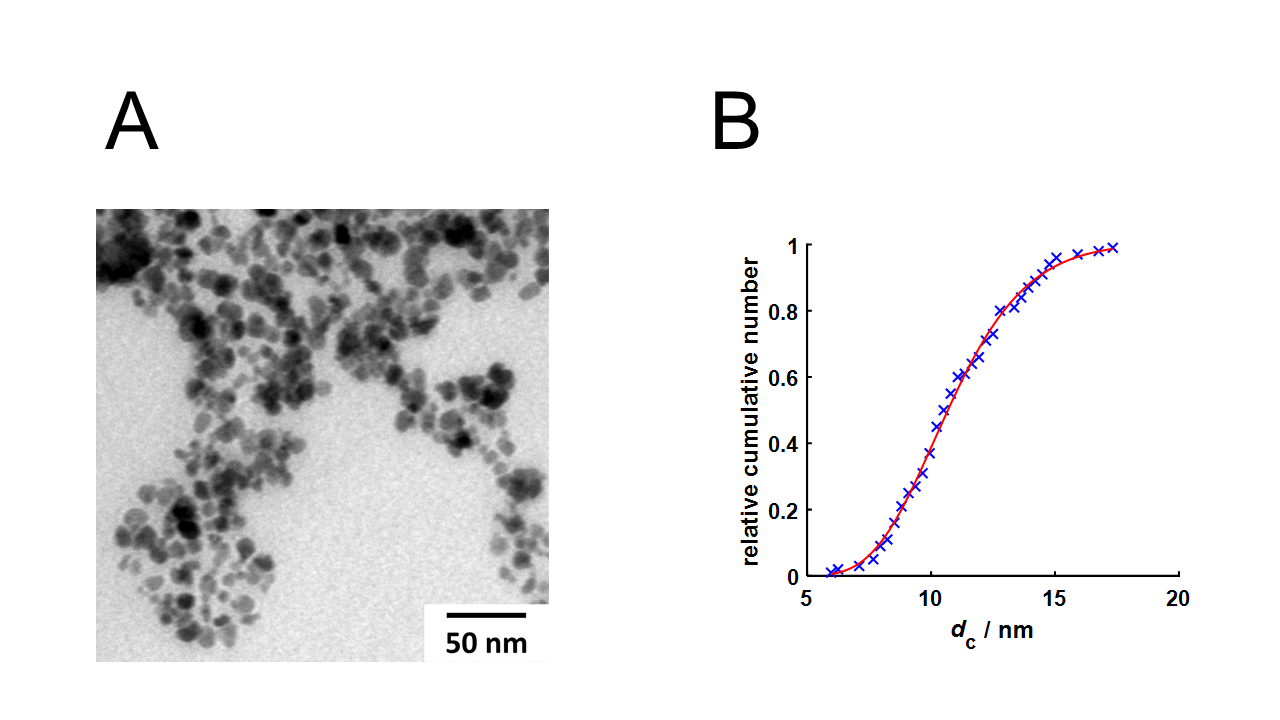


**Supplementary Figure S2**

(A) TEM images of single ML cores dispersed in TES buffer solution using a Zeiss LEO 906 microscope (Carl Zeiss GmbH, Oberkochen, Germany) at a magnification of 100000.

(B) Core diameter distribution of magnetoliposomes depicted as a cumulative log-normal distribution probability density function for a number of n = 100 magnetoliposomes, where erf is the error function and *d* the core diameter of the magnetoliposomes. By fitting the parameters *µ* and *σ* were obtained allowing for mean core diameter calculation with the variance which was 11.1 ± 2.5 nm.


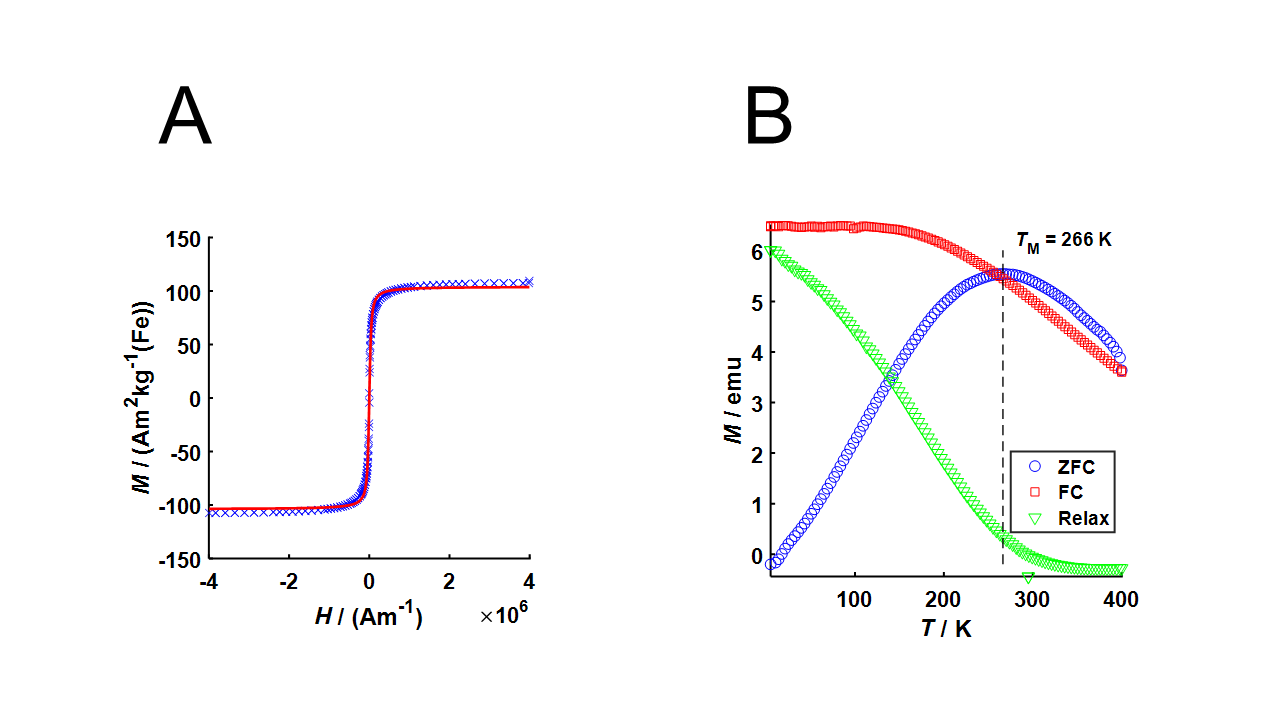


**Supplementary Figure S3**

(A) Analysis of magnetization properties of dispersed ML mixed with equal volume of 15%(w/w) mannitol solution in a polycarbonate (PC) capsule using a SQUID magnetometer MPMS 5S (LOT Quantum Design, San Diego, USA).

Determination of the saturation magnetization by fitting the Langevin function: where *µ* = *V*M*M*S denoted the particle magnetic moment, *VM* the mean magnetic volume (10.3 ± 2.9 nm), *H* the applied magnetic field and *k*B =  1.38·10- 23 J/K the Boltzmann constant revealed a saturation magnetization of 104 ± 1 Am2/kg(Fe).

(B) Peak temperature of the ZFC magnetization curve showed to be 266 ± 1 K.

**
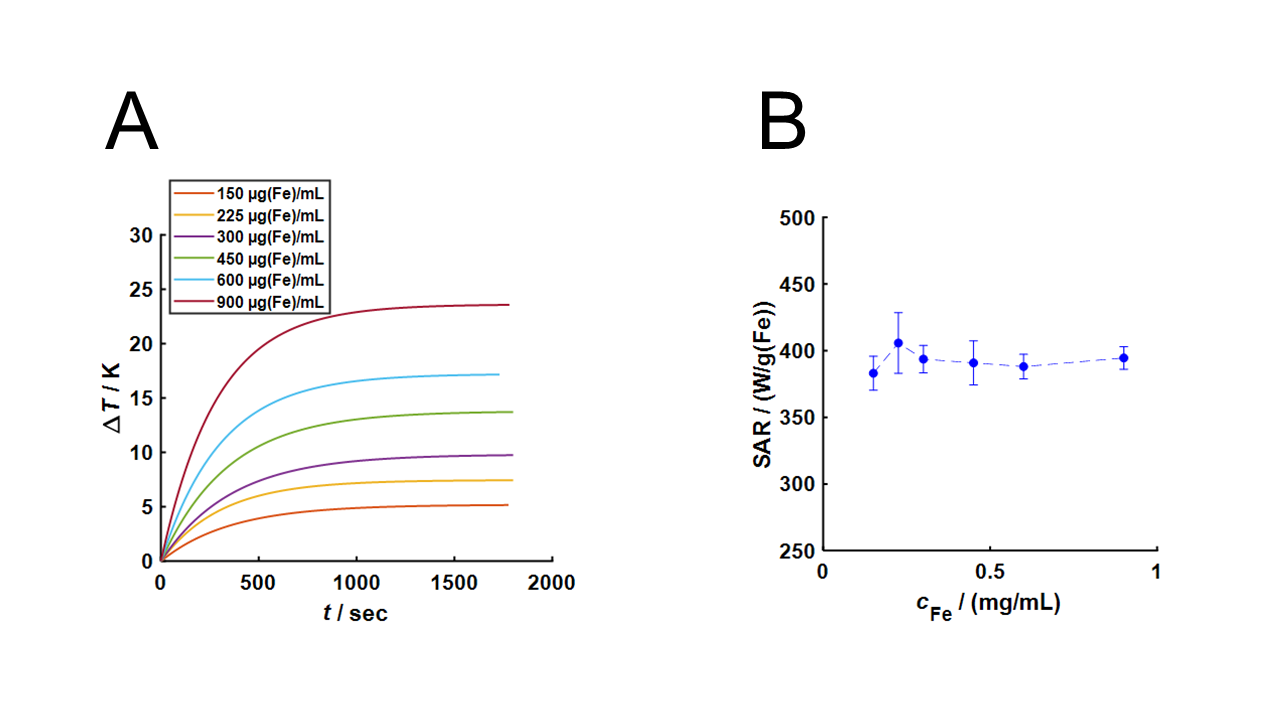
**

**Supplementary Figure S4**

(A) Heating curves Δ*T* (Temperature increase with respect to a reference)of ML dispersed in TES buffer solution with different iron concentrations from 150 µg(Fe)/mL up to 900 µg(Fe)/mL. MFH measurements were performed using a custom-build hyperthermia setup (Trumpf Hüttinger GmbH + Co. KG, Freiburg, Germany). Dispersed ML of 1 mL were exposed to the AMF (270 kHz, 40 kA/m) for 30 min starting at an initial temperature of *T*0 = 37 °C.

(B) Corresponding SAR values of ML. SAR values were determined by fitting the Box-Lucas function: . With fitting parameters (b, ), 4.187 J(gK)-1 the specific heat capacity and the iron mass fraction, the SAR values were calculated as:
